# Supplementary material
Source: publisher site journal article supplement (https://static.cambridge.org/content/id/urn:cambridge.org:id:article:S0027763016000428/resource/name/NMJ1600042supp.zip)
Supplement: Supplementary file 1 [file NMJ1600042supp.zip]

# Documentation for the program “SymplecticFillings”

Mohan Bhupal

The program SymplecticFillings [1] lists symplectic fillings of the links of quotient surface singularities which are neither cyclic quotient nor dihedral according to the algorithm presented in [3]. As input the program takes a file named “SingularitiesList.txt”. Each line in the input file should present the compactifying divisor corresponding to a quotient surface singularity link according to [2]. The format should be

$$\text{Type } D \cdot D \ C_1 \cdot C_1 \ \cdots \ C_k \cdot C_k,$$

where “1” denotes type  $(3, 2)$  and “2” denotes type  $(3, 1)$ . As output the program produces a file named “FillingsList.txt”. In this file, a list of minimal symplectic fillings of the singularity links presented in the file SingularitiesList.txt is given. The format of the presentation in FillingsList.txt is as described in [2].

## References

- [1] M. Bhupal, C++program to compute symplectic fillings of links of quotient surface singularities, Available at [www.metu.edu.tr/~bhupal](http://www.metu.edu.tr/~bhupal).
- [2] M. Bhupal M. and K. Ono, *Symplectic fillings of links of quotient surface singularities*, Nagoya Math. J. **207** (2012), 1-45.
- [3] M. Bhupal M. and K. Ono, *Erratum to “Symplectic fillings of links of quotient surface singularities”*, preprint.

DEPARTMENT OF MATHEMATICS, MIDDLE EAST TECHNICAL UNIVERSITY, 06800 ANKARA, TURKEY.

E-mail address: [bhupal@metu.edu.tr](mailto:bhupal@metu.edu.tr)
